# Supplementary material
Source: publisher site journal article supplement (https://www.dovepress.com/article/402357)
Supplement: Supplementary file 1 [file get_supplementary_file.php]

**Supplementary Table 1.** National Drug Codes used to identify aripiprazole tablets with sensor

| **Medication** | **NDC** | | | | | |
| --- | --- | --- | --- | --- | --- | --- |
| Abilify MyCite®  (aripiprazole tablets with sensor) | 59148-029-07 | 59148-030-07 | 59148-031-07 | 59148-032-07 | 59148-033-07 | 59148-034-07 |
| 59148-029-13 | 59148-030-13 | 59148-031-13 | 59148-032-13 | 59148-033-13 | 59148-034-13 |
| 59148-029-61 | 59148-030-61 | 59148-031-61 | 59148-032-61 | 59148-033-61 | 59148-034-61 |
| 59148-029-72 | 59148-030-72 | 59148-031-72 | 59148-032-72 | 59148-033-72 | 59148-034-72 |
| 59148-029-85 | 59148-030-85 | 59148-031-85 | 59148-032-85 | 59148-033-85 | 59148-034-85 |
| 59148-029-90 | 59148-030-90 | 59148-031-90 | 59148-032-90 | 59148-033-90 | 59148-034-90 |

**Notes:**

**Abbreviations:** NDC, National Drug Codes.
